# Supplementary material for: Two-phase late Paleozoic magmatism (~ 313–312 and ~ 299–298 Ma) in the Lusatian Block and its relation to large scale NW striking fault zones: evidence from zircon U–Pb CA–ID–TIMS geochronology, bulk rock- and zircon chemistry
Source: Springer Nature journal article supplement (doi:10.1007/s00531-021-02092-y), 2021-08-12
Supplement: MOESM1 [file 531_2021_2092_MOESM1_ESM.pdf]

**Supplement 1:** Single grain Pb/Pb evaporation ages, in case of repeated measurements  
not shown: repeated measurements on the same zircon, grains with  $^{204}\text{Pb}/^{206}\text{Pb} > 0.002$   
and measurements with errors  $> 20$  Ma

sample/zircon grain       $^{204}\text{Pb}/^{206}\text{Pb}$      $^{207}\text{Pb}/^{206}\text{Pb}$  (corr.)    error (2 $\sigma$ , abs.)    number of scans    age [Ma]    error (2 $\sigma$ , abs.)

**a) biotite bearing granites of Koenigshain**

**BGK1**

|    |          |          |          |    |              |             |
|----|----------|----------|----------|----|--------------|-------------|
| 2  | 0.000141 | 0.054445 | 0.000143 | 90 | <b>311.0</b> | <b>11.2</b> |
| 3  | 0.000112 | 0.054117 | 0.000039 | 76 | <b>315.4</b> | <b>6.6</b>  |
| 4  | 0.000053 | 0.053312 | 0.000094 | 88 | <b>317.2</b> | <b>8.7</b>  |
| 5  | 0.000048 | 0.053245 | 0.000046 | 89 | <b>317.6</b> | <b>6.7</b>  |
| 6  | 0.000044 | 0.053201 | 0.000103 | 61 | <b>317.9</b> | <b>9.2</b>  |
| 7  | 0.000115 | 0.054246 | 0.000046 | 90 | <b>318.6</b> | <b>6.9</b>  |
| 9  | 0.000039 | 0.053160 | 0.000054 | 88 | <b>319.0</b> | <b>7.4</b>  |
| 10 | 0.000085 | 0.053828 | 0.000034 | 89 | <b>319.4</b> | <b>6.4</b>  |
| 11 | 0.000037 | 0.053146 | 0.000034 | 89 | <b>319.8</b> | <b>6.3</b>  |
| 12 | 0.000183 | 0.055254 | 0.000097 | 89 | <b>320.5</b> | <b>6.9</b>  |
| 13 | 0.000031 | 0.053105 | 0.000039 | 89 | <b>321.7</b> | <b>6.7</b>  |
| 17 | 0.000121 | 0.054498 | 0.000049 | 90 | <b>326.1</b> | <b>7.1</b>  |

**weighted mean**    **319.2**    **2.0**  
n=12    MSWD=0.78

**BGK2**

|   |          |          |          |    |              |              |   |
|---|----------|----------|----------|----|--------------|--------------|---|
| 1 | 0.000079 | 0.053584 | 0.000229 | 29 | <b>312.8</b> | <b>&gt;5</b> | 5 |
| 2 | 0.000077 | 0.053657 | 0.000200 | 90 | <b>316.9</b> | <b>&gt;5</b> | 5 |
| 3 | 0.000172 | 0.055071 | 0.000100 | 90 | <b>318.8</b> | <b>&gt;5</b> | 5 |
| 4 | 0.000017 | 0.052910 | 0.000062 | 90 | <b>322.4</b> | <b>&gt;5</b> | 5 |
| 5 | 0.000010 | 0.052846 | 0.000131 | 89 | <b>322.8</b> | <b>&gt;5</b> | 5 |
| 6 | 0.000138 | 0.054662 | 0.000112 | 89 | <b>322.8</b> | <b>&gt;5</b> | 5 |
| 8 | 0.000044 | 0.053347 | 0.000140 | 87 | <b>324.4</b> | <b>&gt;5</b> | 5 |

**weighted mean**    **320.1**    **3.8**  
n=7    MSWD=2.8

**BGK3**

|   |          |          |          |    |              |             |
|---|----------|----------|----------|----|--------------|-------------|
| 5 | 0.000103 | 0.054129 | 0.000121 | 90 | <b>321.6</b> | <b>10.3</b> |
| 6 | 0.000139 | 0.054723 | 0.000003 | 90 | <b>324.5</b> | <b>6.4</b>  |
| 7 | 0.000042 | 0.053338 | 0.000028 | 90 | <b>325.1</b> | <b>6.2</b>  |

**weighted mean**    **324.3**    **4.0**  
n=3    MSWD=0.2

**BGK4**

|   |          |          |          |    |              |            |
|---|----------|----------|----------|----|--------------|------------|
| 2 | 0.000040 | 0.053080 | 0.000051 | 89 | <b>315.3</b> | <b>7.1</b> |
| 4 | 0.000085 | 0.053800 | 0.000052 | 90 | <b>318.1</b> | <b>7.2</b> |
| 7 | 0.000172 | 0.055074 | 0.000071 | 90 | <b>318.8</b> | <b>7.8</b> |
| 8 | 0.000032 | 0.053218 | 0.000086 | 90 | <b>326.1</b> | <b>8.5</b> |
| 9 | 0.000070 | 0.053942 | 0.000057 | 90 | 334.0        | 7.4        |

**weighted mean**    **319.1**    **6.9**  
n=4    MSWD=1.3

**b) biotite-bearing granites of Stolpen**

**BGSt11**

|    |          |          |          |    |              |            |
|----|----------|----------|----------|----|--------------|------------|
| 1  | 0.000094 | 0.052402 | 0.000045 | 89 | <b>303</b>   | <b>1.9</b> |
| 2  | 0.000181 | 0.052719 | 0.000045 | 85 | <b>316.7</b> | <b>2</b>   |
| 3  | 0.000073 | 0.052340 | 0.000165 | 90 | <b>300.2</b> | <b>7.2</b> |
| 4  | 0.000058 | 0.052473 | 0.000050 | 90 | <b>306</b>   | <b>2.2</b> |
| 5  | 0.000060 | 0.052381 | 0.000088 | 90 | <b>302</b>   | <b>3.8</b> |
| 6  | 0.000052 | 0.052563 | 0.000110 | 90 | <b>309.9</b> | <b>4.8</b> |
| 10 | 0.000084 | 0.052399 | 0.000071 | 90 | <b>302.8</b> | <b>3.1</b> |
| 11 | 0.000063 | 0.052032 | 0.000117 | 80 | 286.8        | 7.5        |
| 12 | 0.000044 | 0.052535 | 0.000067 | 89 | <b>308.7</b> | <b>2.9</b> |

|               |    |          |          |          |                      |              |                |
|---------------|----|----------|----------|----------|----------------------|--------------|----------------|
|               |    |          |          |          | <b>weighted mean</b> | <b>307.5</b> | <b>4.9</b>     |
|               |    |          |          |          |                      | <b>n=8</b>   | <b>MSWD=19</b> |
| <b>BGSt13</b> |    |          |          |          |                      |              |                |
|               | 1  | 0.000056 | 0.052428 | 0.002050 | 90                   | <b>304.1</b> | <b>8.9</b>     |
|               | 2  | 0.000133 | 0.052409 | 0.000062 | 90                   | <b>303.3</b> | <b>2.7</b>     |
|               | 10 | 0.000169 | 0.052546 | 0.000068 | 89                   | <b>309.2</b> | <b>2.9</b>     |
|               | 18 | 0.000112 | 0.052481 | 0.000054 | 87                   | <b>306.4</b> | <b>2.3</b>     |

|               |    |            |          |           |    |                      |              |                 |
|---------------|----|------------|----------|-----------|----|----------------------|--------------|-----------------|
|               |    |            |          |           |    | <b>weighted mean</b> | <b>306.1</b> | <b>4.1</b>      |
|               |    |            |          |           |    |                      | <b>n=4</b>   | <b>MSWD=3.0</b> |
| <b>BGSt14</b> |    |            |          |           |    |                      |              |                 |
|               | 1  | 0.0000627  | 0.052402 | 0.0000958 | 90 | <b>302.9</b>         | <b>4.2</b>   |                 |
|               | 4  | 0.0000988  | 0.052479 | 0.0000684 | 90 | <b>306.3</b>         | <b>3</b>     |                 |
|               | 5  | 0.000104   | 0.052445 | 0.0000637 | 90 | <b>304.8</b>         | <b>2.8</b>   |                 |
|               | 6  | 0.000057   | 0.052401 | 0.0000603 | 90 | <b>302.9</b>         | <b>2.6</b>   |                 |
|               | 7  | 0.000161   | 0.052517 | 0.0000835 | 90 | <b>307.9</b>         | <b>3.6</b>   |                 |
|               | 8  | 0.0000352  | 0.052473 | 0.0000573 | 90 | <b>306</b>           | <b>2.5</b>   |                 |
|               | 10 | 0.00000675 | 0.052949 | 0.000226  | 42 | 326.5                | 9.7          |                 |
|               | 11 | 0.000112   | 0.05234  | 0.0000623 | 84 | <b>300.2</b>         | <b>2.7</b>   |                 |
|               | 12 | 0.0000947  | 0.052375 | 0.0000659 | 85 | <b>301.8</b>         | <b>2.8</b>   |                 |

|                                      |    |          |          |          |    |                      |              |                 |
|--------------------------------------|----|----------|----------|----------|----|----------------------|--------------|-----------------|
|                                      |    |          |          |          |    | <b>weighted mean</b> | <b>303.9</b> | <b>2.1</b>      |
|                                      |    |          |          |          |    |                      | <b>n=8</b>   | <b>MSWD=3.0</b> |
| <b>c) amphibole bearing granites</b> |    |          |          |          |    |                      |              |                 |
| <b>AG59</b>                          |    |          |          |          |    |                      |              |                 |
|                                      | 1  | 0.000023 | 0.053020 | 0.000153 | 90 | <b>329.6</b>         | <b>6.6</b>   |                 |
|                                      | 5  | 0.000163 | 0.052777 | 0.000037 | 90 | <b>319.2</b>         | <b>1.5</b>   |                 |
|                                      | 6  | 0.000177 | 0.053182 | 0.000068 | 90 | 336.5                | 2.9          |                 |
|                                      | 11 | 0.000154 | 0.053381 | 0.000050 | 89 | 345.0                | 2.1          |                 |
|                                      | 12 | 0.000081 | 0.052803 | 0.000054 | 87 | <b>320.3</b>         | <b>2.3</b>   |                 |
|                                      | 13 | 0.000111 | 0.052852 | 0.000051 | 90 | <b>322.4</b>         | <b>2.2</b>   |                 |
|                                      | 14 | 0.000085 | 0.053027 | 0.000068 | 89 | <b>329.9</b>         | <b>2.9</b>   |                 |

|             |    |          |          |          |    |                      |              |                |
|-------------|----|----------|----------|----------|----|----------------------|--------------|----------------|
|             |    |          |          |          |    | <b>weighted mean</b> | <b>321.6</b> | <b>5</b>       |
|             |    |          |          |          |    |                      | <b>n=5</b>   | <b>MSWD=13</b> |
| <b>AG61</b> |    |          |          |          |    |                      |              |                |
|             | 1  | 0.000113 | 0.058165 | 0.000063 | 90 | 535.9                | 2.4          |                |
|             | 2  | 0.000061 | 0.052979 | 0.000109 | 90 | <b>327.8</b>         | <b>4.7</b>   |                |
|             | 3  | 0.000114 | 0.053081 | 0.000050 | 90 | <b>332.2</b>         | <b>2.1</b>   |                |
|             | 4  | 0.000144 | 0.056177 | 0.000041 | 90 | 459.3                | 1.6          |                |
|             | 5  | 0.000046 | 0.058503 | 0.000045 | 90 | 548.6                | 1.7          |                |
|             | 6  | 0.000050 | 0.058227 | 0.000150 | 90 | 538.3                | 5.7          |                |
|             | 7  | 0.000063 | 0.058389 | 0.000140 | 90 | 544.3                | 5.3          |                |
|             | 13 | 0.000010 | 0.052702 | 0.000197 | 88 | <b>316.0</b>         | <b>8.5</b>   |                |
|             | 15 | 0.000004 | 0.058268 | 0.000191 | 88 | 539.8                | 7.2          |                |
|             | 16 | 0.000084 | 0.052813 | 0.000140 | 88 | <b>320.7</b>         | <b>6.0</b>   |                |
|             | 18 | 0.000067 | 0.052727 | 0.000173 | 90 | <b>317.0</b>         | <b>7.5</b>   |                |
|             | 19 | 0.000113 | 0.058546 | 0.000109 | 89 | 550.2                | 4.1          |                |
|             | 23 | 0.000017 | 0.056999 | 0.000062 | 90 | 491.5                | 2.5          |                |
|             | 24 | 0.000023 | 0.058019 | 0.000079 | 90 | 530.4                | 3.0          |                |
|             | 25 | 0.000029 | 0.058249 | 0.000120 | 90 | 539.1                | 4.5          |                |
|             | 27 | 0.000092 | 0.052761 | 0.000072 | 90 | <b>318.5</b>         | <b>3.1</b>   |                |
|             | 29 | 0.000048 | 0.052720 | 0.000198 | 90 | <b>316.7</b>         | <b>8.6</b>   |                |
|             | 30 | 0.000170 | 0.054608 | 0.000237 | 90 | 396.1                | 9.8          |                |
|             | 31 | 0.000074 | 0.053628 | 0.001620 | 18 | 355.4                | 68.4         |                |
|             | 32 | 0.000033 | 0.052513 | 0.000166 | 90 | <b>307.8</b>         | <b>7.2</b>   |                |
|             | 33 | 0.000055 | 0.053149 | 0.000025 | 90 | <b>335.1</b>         | <b>1.1</b>   |                |

|             |  |  |  |  |  |                      |              |                |
|-------------|--|--|--|--|--|----------------------|--------------|----------------|
|             |  |  |  |  |  | <b>weighted mean</b> | <b>325.4</b> | <b>5.2</b>     |
|             |  |  |  |  |  |                      | <b>n=9</b>   | <b>MSWD=27</b> |
| <b>AG65</b> |  |  |  |  |  |                      |              |                |

|    |          |          |          |    |              |             |
|----|----------|----------|----------|----|--------------|-------------|
| 16 | 0.000030 | 0.052452 | 0.000396 | 90 | <b>305.2</b> | <b>17.2</b> |
| 10 | 0.000036 | 0.052732 | 0.000336 | 90 | <b>317.3</b> | <b>14.5</b> |
| 5  | 0.000109 | 0.052733 | 0.000037 | 88 | <b>317.3</b> | <b>1.6</b>  |
| 6  | 0.000138 | 0.052733 | 0.000054 | 90 | <b>317.3</b> | <b>2.4</b>  |
| 2  | 0.000091 | 0.052901 | 0.000056 | 90 | <b>324.5</b> | <b>2.4</b>  |
| 9  | 0.000034 | 0.052969 | 0.000191 | 90 | <b>327.5</b> | <b>8.2</b>  |
| 4  | 0.000111 | 0.053027 | 0.000123 | 90 | <b>329.9</b> | <b>5.3</b>  |
| 7  | 0.000199 | 0.053102 | 0.000047 | 87 | <b>333.1</b> | <b>2</b>    |
| 11 | 0.000049 | 0.053124 | 0.000138 | 90 | 334.1        | 5.9         |
| 8  | 0.000089 | 0.053338 | 0.000871 | 87 | 343.2        | 36.9        |
| 14 | 0.000078 | 0.053393 | 0.000219 | 90 | 345.5        | 9.3         |
| 13 | 0.000050 | 0.053509 | 0.000113 | 90 | 350.4        | 4.8         |
| 12 | 0.000139 | 0.053811 | 0.000453 | 90 | 363.2        | 19.0        |

**322.8**      **6.0**  
**n=8**      **MSWD=27**

**d) volcanic rocks in dykes**

**VR03**

|    |          |          |          |    |              |             |
|----|----------|----------|----------|----|--------------|-------------|
| 15 | 0.000191 | 0.052066 | 0.000095 | 75 | <b>288.3</b> | <b>4.2</b>  |
| 4  | 0.000146 | 0.052093 | 0.000243 | 71 | <b>289.5</b> | <b>10.7</b> |
| 8  | 0.000168 | 0.052425 | 0.000109 | 87 | <b>304.0</b> | <b>4.7</b>  |
| 6  | 0.000006 | 0.052482 | 0.000076 | 52 | <b>306.4</b> | <b>3.3</b>  |
| 9  | 0.000115 | 0.053005 | 0.000179 | 90 | 329.0        | 7.7         |
| 12 | 0.000103 | 0.053426 | 0.000208 | 90 | 346.9        | 8.8         |
| 3  | 0.000084 | 0.052573 | 0.001413 | 90 | 310.4        | 59.5        |
| 5  | 0.000065 | 0.052884 | 0.000299 | 90 | 323.8        | 12.7        |
| 6  | 0.000121 | 0.053621 | 0.000128 | 90 | 355.2        | 5.7         |
| 4  | 0.000184 | 0.054481 | 0.000292 | 90 | 391.0        | 12.1        |

**weighted mean**      **300.0**      **15**  
**n=4**      **MSWD=18**

**VR09**

|    |          |          |          |    |              |             |
|----|----------|----------|----------|----|--------------|-------------|
| 1  | 0.000034 | 0.052600 | 0.000152 | 42 | <b>311.5</b> | <b>6.6</b>  |
| 2  | 0.000024 | 0.052445 | 0.000050 | 90 | <b>304.8</b> | <b>2.2</b>  |
| 3  | 0.000188 | 0.051904 | 0.000143 | 26 | 281.1        | 6.3         |
| 3  | 0.000018 | 0.052378 | 0.000038 | 88 | <b>301.9</b> | <b>1.6</b>  |
| 4  | 0.000015 | 0.052463 | 0.000105 | 90 | <b>305.6</b> | <b>4.5</b>  |
| 5  | 0.000167 | 0.050281 | 0.000257 | 90 | 208          | 11.8        |
| 6  | 0.000055 | 0.051873 | 0.000445 | 26 | <b>279.8</b> | <b>19.6</b> |
| 7  | 0.000079 | 0.052611 | 0.000131 | 61 | <b>312</b>   | <b>5.7</b>  |
| 8  | 0.000044 | 0.052292 | 0.000050 | 90 | <b>298.2</b> | <b>2.1</b>  |
| 9  | 0.000023 | 0.052408 | 0.000077 | 86 | <b>303.2</b> | <b>3.3</b>  |
| 11 | 0.000090 | 0.052199 | 0.000141 | 66 | <b>294.1</b> | <b>6.2</b>  |
| 14 | 0.000027 | 0.052494 | 0.000048 | 90 | <b>306.9</b> | <b>2.1</b>  |
| 15 | 0.000022 | 0.052323 | 0.000058 | 68 | <b>299.5</b> | <b>2.5</b>  |

**weighted mean**      **302.7**      **2.6**  
**n=11**      **MSWD=7.8**

**VR10**

|    |          |          |          |    |              |            |
|----|----------|----------|----------|----|--------------|------------|
| 12 | 0.000027 | 0.052306 | 0.000033 | 87 | <b>298.8</b> | <b>1.4</b> |
| 7  | 0.000076 | 0.052312 | 0.000155 | 90 | <b>299</b>   | <b>6.7</b> |
| 14 | 0.000042 | 0.052382 | 0.000044 | 85 | <b>302.1</b> | <b>1.9</b> |
| 18 | 0.000035 | 0.052441 | 0.00011  | 42 | <b>304.6</b> | <b>4.8</b> |
| 15 | 0.000027 | 0.052473 | 0.00007  | 88 | <b>306</b>   | <b>3</b>   |
| 19 | 0.000051 | 0.052496 | 0.000066 | 88 | <b>307</b>   | <b>2.8</b> |
| 13 | 0.000032 | 0.052501 | 0.000049 | 90 | <b>307.3</b> | <b>2.1</b> |
| 16 | 0.000048 | 0.052522 | 0.000036 | 90 | <b>308.2</b> | <b>1.6</b> |

**weighted mean**      **303.8**      **3.5**  
**n=8**      **MSWD=15**

**VR11**

|    |          |          |          |    |              |             |
|----|----------|----------|----------|----|--------------|-------------|
| 1  | 0.000108 | 0.052063 | 0.000051 | 90 | <b>288.1</b> | <b>2.3</b>  |
| 2  | 0.000097 | 0.052406 | 0.000247 | 90 | <b>303.1</b> | <b>10.8</b> |
| 5  | 0.000059 | 0.052574 | 0.000094 | 90 | <b>310.4</b> | <b>4.1</b>  |
| 6  | 0.000037 | 0.052480 | 0.000353 | 9  | <b>306.3</b> | <b>15.4</b> |
| 7  | 0.000050 | 0.052405 | 0.000192 | 51 | <b>303.1</b> | <b>8.3</b>  |
| 8  | 0.000158 | 0.052039 | 0.000204 | 89 | <b>287.1</b> | <b>9</b>    |
| 9  | 0.000104 | 0.051912 | 0.000086 | 90 | 281.5        | 3.8         |
| 10 | 0.000084 | 0.052056 | 0.000225 | 11 | <b>287.8</b> | <b>9.8</b>  |
| 11 | 0.000120 | 0.523420 | 0.000073 | 89 | <b>300.3</b> | <b>3.1</b>  |
| 12 | 0.000041 | 0.052386 | 0.000191 | 90 | <b>302.3</b> | <b>8.3</b>  |
| 13 | 0.000094 | 0.052368 | 0.000266 | 89 | <b>301.5</b> | <b>11.6</b> |
| 15 | 0.000132 | 0.052125 | 0.000132 | 90 | <b>290.9</b> | <b>5.7</b>  |

**weighted mean**    **295.6**    **5.8**  
**n=11**    **MSWD=12**

**VR15**

|   |          |          |          |    |              |            |
|---|----------|----------|----------|----|--------------|------------|
| 3 | 0.000114 | 0.053006 | 0.000049 | 86 | <b>329</b>   | <b>2.1</b> |
| 4 | 0.000057 | 0.052228 | 0.000171 | 90 | 295.3        | 7.5        |
| 6 | 0.000092 | 0.052935 | 0.000049 | 90 | <b>326</b>   | <b>2.1</b> |
| 7 | 0.000098 | 0.052865 | 0.000142 | 90 | <b>322.9</b> | <b>6.1</b> |
| 8 | 0.000068 | 0.052824 | 0.000078 | 89 | <b>321.2</b> | <b>3.4</b> |
| 9 | 0.000013 | 0.052903 | 0.000045 | 89 | <b>324.6</b> | <b>1.9</b> |

**weighted mean**    **325.8**    **3.3**  
**n=5**    **MSWD=4.8**

**VR20**

|    |          |          |          |    |              |            |
|----|----------|----------|----------|----|--------------|------------|
| 2  | 0.000147 | 0.052434 | 0.000061 | 89 | <b>304.3</b> | <b>2.7</b> |
| 3  | 0.000080 | 0.052358 | 0.000070 | 89 | <b>301</b>   | <b>3</b>   |
| 5  | 0.000091 | 0.052501 | 0.000045 | 90 | <b>307.2</b> | <b>1.9</b> |
| 6  | 0.000183 | 0.052445 | 0.000175 | 90 | <b>304.8</b> | <b>7.6</b> |
| 8  | 0.000144 | 0.052404 | 0.000034 | 90 | <b>303</b>   | <b>1.5</b> |
| 9  | 0.000187 | 0.051704 | 0.000098 | 89 | 272.3        | 4.3        |
| 10 | 0.000068 | 0.052291 | 0.000050 | 90 | <b>298.1</b> | <b>2.2</b> |
| 12 | 0.000074 | 0.052329 | 0.000055 | 90 | <b>299.8</b> | <b>2.4</b> |
| 13 | 0.000127 | 0.052249 | 0.000086 | 90 | <b>296.3</b> | <b>3.8</b> |
| 14 | 0.000069 | 0.052392 | 0.000088 | 90 | <b>302.5</b> | <b>3.8</b> |
| 15 | 0.000022 | 0.052938 | 0.000268 | 89 | 326.1        | 11.5       |
| 17 | 0.000142 | 0.052431 | 0.000057 | 89 | <b>304.2</b> | <b>2.5</b> |
| 18 | 0.000093 | 0.052504 | 0.000031 | 90 | <b>307.4</b> | <b>1.3</b> |
| 19 | 0.000159 | 0.052504 | 0.000048 | 89 | <b>307.4</b> | <b>2.1</b> |
| 20 | 0.000071 | 0.052397 | 0.000209 | 70 | <b>302.7</b> | <b>9.1</b> |

**weighted mean**    **304.2**    **2.1**  
**n=13**    **MSWD=9.4**

**VR34**

|    |          |          |          |    |              |            |
|----|----------|----------|----------|----|--------------|------------|
| 1  | 0.000092 | 0.050685 | 0.000098 | 89 | 225.7        | 4.3        |
| 2  | 0.000086 | 0.05223  | 0.000037 | 90 | <b>295.4</b> | <b>1.7</b> |
| 3  | 0.000141 | 0.045655 | 0.000811 | 89 | 0            | 11         |
| 5  | 0.000035 | 0.04701  | 0.000167 | 89 | 48.3         | 8.1        |
| 5  | 0.000115 | 0.052229 | 0.000071 | 89 | <b>295.9</b> | <b>2.9</b> |
| 6  | 0.000056 | 0.05231  | 0.000104 | 89 | <b>299.6</b> | <b>4.3</b> |
| 7  | 0.000122 | 0.052013 | 0.000058 | 90 | <b>285.9</b> | <b>2.5</b> |
| 9  | 0.00008  | 0.052224 | 0.000043 | 90 | <b>295.2</b> | <b>1.8</b> |
| 10 | 0.000126 | 0.052294 | 0.000109 | 89 | <b>299.2</b> | <b>4.4</b> |
| 11 | 0.000124 | 0.052725 | 0.000078 | 90 | <b>316.9</b> | <b>3.3</b> |
| 15 | 0.000141 | 0.052871 | 0.000096 | 90 | <b>323.2</b> | <b>4.2</b> |
| 16 | 0.000119 | 0.052856 | 0.000124 | 90 | <b>322.6</b> | <b>5.4</b> |

**weighted mean**    **298.2**    **8**  
**n=9**    **MSWD=59**

**e) volcanic rocks of the Weissig Basin**

**VR65**

|    |          |          |          |    |              |            |
|----|----------|----------|----------|----|--------------|------------|
| 7  | 0.000117 | 0.052306 | 0.000108 | 50 | <b>298.7</b> | <b>4.7</b> |
| 5  | 0.000089 | 0.052394 | 0.000043 | 90 | <b>302.6</b> | <b>1.8</b> |
| 2  | 0.000075 | 0.052400 | 0.000050 | 90 | <b>302.8</b> | <b>2.1</b> |
| 9  | 0.000114 | 0.052412 | 0.000143 | 90 | <b>303.4</b> | <b>6.2</b> |
| 12 | 0.000074 | 0.052497 | 0.000058 | 90 | <b>307.1</b> | <b>2.5</b> |
| 1  | 0.000052 | 0.052512 | 0.000041 | 90 | <b>307.7</b> | <b>1.8</b> |
| 8  | 0.000069 | 0.052593 | 0.000038 | 90 | <b>311.2</b> | <b>1.7</b> |
| 6  | 0.000170 | 0.053081 | 0.000047 | 18 | 332.2        | 20.3       |
| 3  | 0.000104 | 0.053335 | 0.000102 | 90 | 343          | 4.3        |

**weighted mean      306.2      3.6**  
**n=7      MSWD=13**

**VR67**

|    |          |          |          |    |              |             |
|----|----------|----------|----------|----|--------------|-------------|
| 1  | 0.000009 | 0.052696 | 0.000203 | 53 | <b>315.7</b> | <b>8.8</b>  |
| 2  | 0.000005 | 0.052755 | 0.000250 | 59 | <b>318.2</b> | <b>10.8</b> |
| 5  | 0.000023 | 0.052713 | 0.000254 | 56 | <b>316.4</b> | <b>11</b>   |
| 8  | 0.000016 | 0.052493 | 0.000106 | 90 | <b>306.9</b> | <b>4.6</b>  |
| 9  | 0.000071 | 0.052285 | 0.000141 | 21 | <b>297.8</b> | <b>6.1</b>  |
| 10 | 0.000090 | 0.052498 | 0.000158 | 88 | <b>307.1</b> | <b>6.8</b>  |
| 14 | 0.000025 | 0.052682 | 0.000069 | 90 | <b>315.1</b> | <b>3</b>    |
| 15 | 0.000040 | 0.052778 | 0.000144 | 89 | <b>319.2</b> | <b>6.2</b>  |
| 16 | 0.000055 | 0.053006 | 0.000105 | 90 | 329          | 4.5         |
| 17 | 0.000044 | 0.052321 | 0.000038 | 90 | <b>299.4</b> | <b>1.7</b>  |
| 18 | 0.000198 | 0.051957 | 0.000118 | 50 | 283.4        | 5.2         |
| 20 | 0.000029 | 0.052364 | 0.000076 | 90 | <b>301.3</b> | <b>3.3</b>  |
| 22 | 0.000061 | 0.052234 | 0.000089 | 89 | <b>295.6</b> | <b>3.9</b>  |
| 24 | 0.000031 | 0.052457 | 0.000088 | 90 | <b>305.4</b> | <b>3.8</b>  |
| 26 | 0.000087 | 0.051872 | 0.000055 | 90 | 279.7        | 2.5         |
| 28 | 0.000094 | 0.051922 | 0.000171 | 31 | 281.9        | 7.5         |
| 29 | 0.000079 | 0.052303 | 0.000151 | 90 | <b>298.6</b> | <b>6.6</b>  |

**weighted mean      303.6      4.3**  
**n=13      MSWD=13**

**f) standards**

**91500 (primary standard)**

|    |          |          |          |    |               |             |
|----|----------|----------|----------|----|---------------|-------------|
| 30 | 0.000036 | 0.075136 | 0.000146 | 90 | <b>1072.1</b> | <b>8.5</b>  |
| 31 | 0.000053 | 0.075066 | 0.000267 | 81 | <b>1070.2</b> | <b>11.8</b> |
| 32 | 0.000087 | 0.074891 | 0.000060 | 90 | <b>1065.5</b> | <b>6.2</b>  |
| 33 | 0.000083 | 0.074750 | 0.000076 | 90 | <b>1061.7</b> | <b>6.5</b>  |
| 34 | 0.000022 | 0.074817 | 0.000056 | 90 | <b>1063.5</b> | <b>6.0</b>  |
| 35 | 0.000061 | 0.074911 | 0.000062 | 89 | <b>1066.1</b> | <b>6.0</b>  |
| 36 | 0.000034 | 0.075021 | 0.000054 | 90 | <b>1069.0</b> | <b>5.8</b>  |

**weighted mean      1066.1      2.5**  
**n=7      MSWD=1.02**

**Temora 2 (secondary standard)**

|    |          |          |          |    |              |            |
|----|----------|----------|----------|----|--------------|------------|
| 1  | 0.000048 | 0.055064 | 0.000103 | 90 | <b>414.8</b> | <b>9.2</b> |
| 2  | 0.000117 | 0.055327 | 0.000075 | 45 | <b>425.4</b> | <b>8.0</b> |
| 3  | 0.000044 | 0.055268 | 0.000090 | 90 | <b>423.0</b> | <b>8.7</b> |
| 4  | 0.000055 | 0.055096 | 0.000117 | 80 | <b>416.1</b> | <b>9.7</b> |
| 5  | 0.000015 | 0.054893 | 0.000107 | 87 | <b>407.8</b> | <b>9.4</b> |
| 6  | 0.000011 | 0.054942 | 0.000089 | 90 | <b>409.8</b> | <b>8.7</b> |
| 7  | 0.000203 | 0.055162 | 0.000103 | 61 | <b>418.8</b> | <b>9.2</b> |
| 8  | 0.000039 | 0.055150 | 0.000049 | 71 | <b>418.3</b> | <b>6.8</b> |
| 9  | 0.000070 | 0.055145 | 0.000127 | 89 | <b>418.0</b> | <b>9.7</b> |
| 10 | 0.000004 | 0.055273 | 0.000046 | 90 | <b>423.2</b> | <b>6.7</b> |

|    |          |          |          |                      |              |                 |
|----|----------|----------|----------|----------------------|--------------|-----------------|
| 11 | 0.000033 | 0.055296 | 0.000091 | 90                   | <b>424.2</b> | <b>8.6</b>      |
| 12 | 0.000399 | 0.055303 | 0.000208 | 90                   | <b>424.5</b> | <b>10.6</b>     |
| 13 | 0.000152 | 0.055356 | 0.000191 | 90                   | <b>426.6</b> | <b>10.1</b>     |
| 14 | 0.000116 | 0.054867 | 0.000183 | 90                   | <b>406.8</b> | <b>13.7</b>     |
| 15 | 0.000035 | 0.055404 | 0.000326 | 90                   | <b>428.5</b> | <b>17.7</b>     |
| 16 | 0.000196 | 0.055153 | 0.000134 | 90                   | <b>418.4</b> | <b>9.7</b>      |
| 17 | 0.000066 | 0.055219 | 0.000102 | 90                   | <b>421.1</b> | <b>8.9</b>      |
|    |          |          |          | <b>weighted mean</b> | <b>419.3</b> | <b>3</b>        |
|    |          |          |          |                      | <b>n=17</b>  | <b>MSWD=1.6</b> |

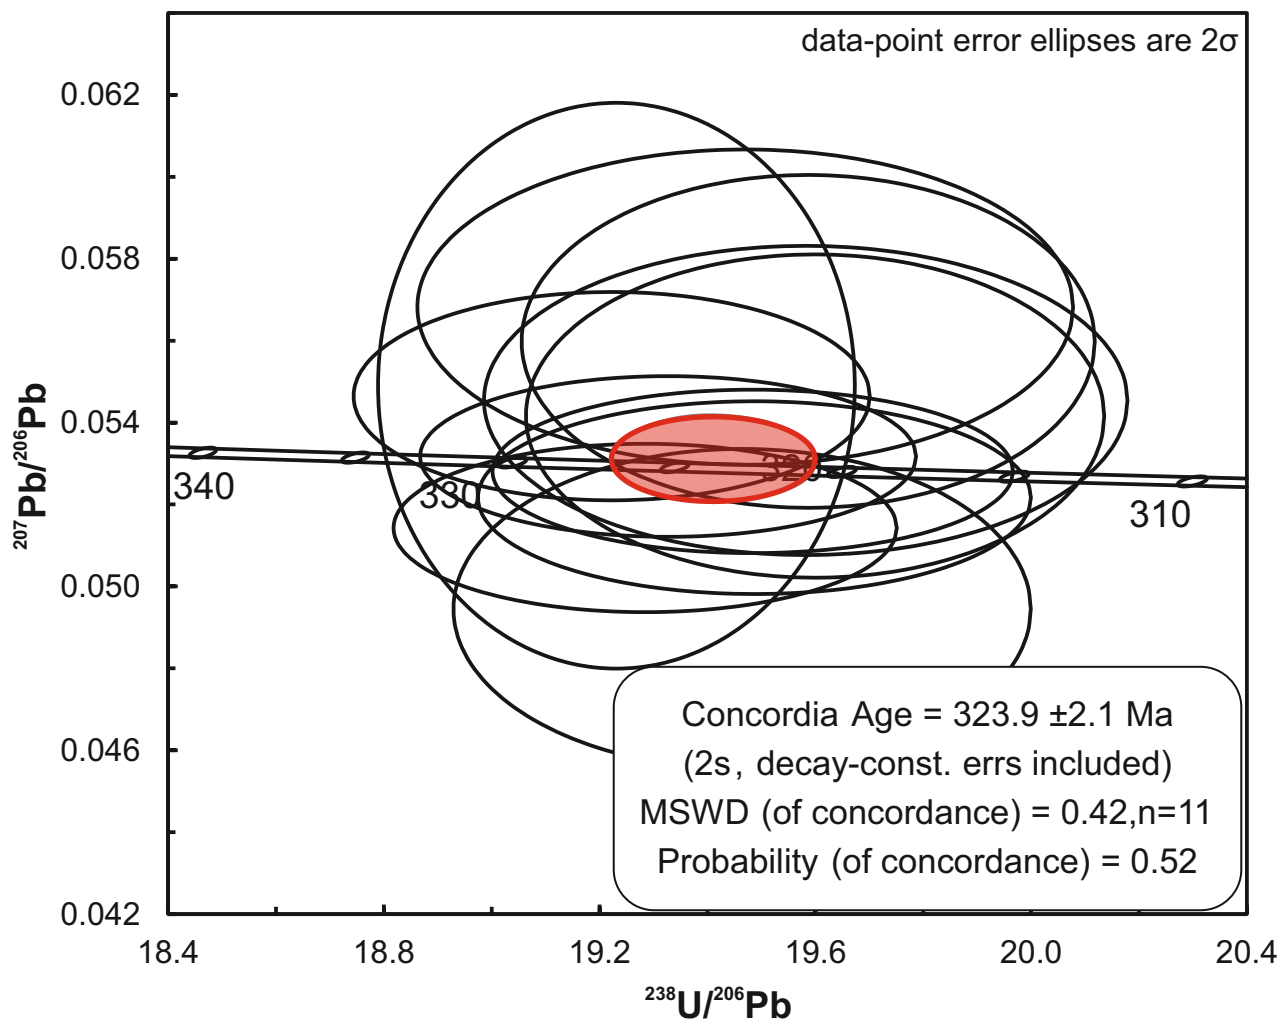

Supplement 2: Results of zircon U-Pb SHRIMP analysis of sample BGK1 in a Concordia (Tera-Wasserburg) diagram. Each analysis is represented by an ellipse with its  $1\sigma$  analytical uncertainty. MSWD (mean square of weighted deviates) is given for equivalence and concordance.

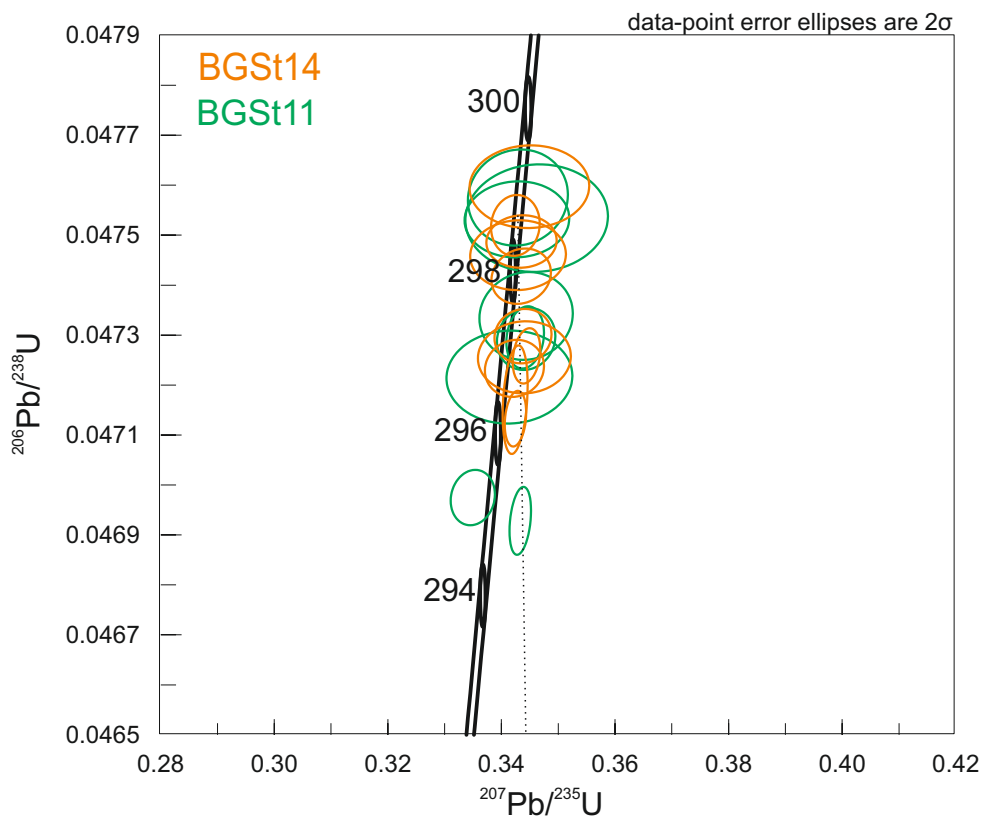

Supplement 3: Zircon U-Pb CA-ID-TIMS analyses of the two samples from the granite of Stolpen in Concordia (Wetherill) diagrams corrected for common Pb by Stacey and Kramers (1975). Each analysis is represented by an ellipse with its 2σ analytical uncertainty. A fictional Discordia is added as stippled line.



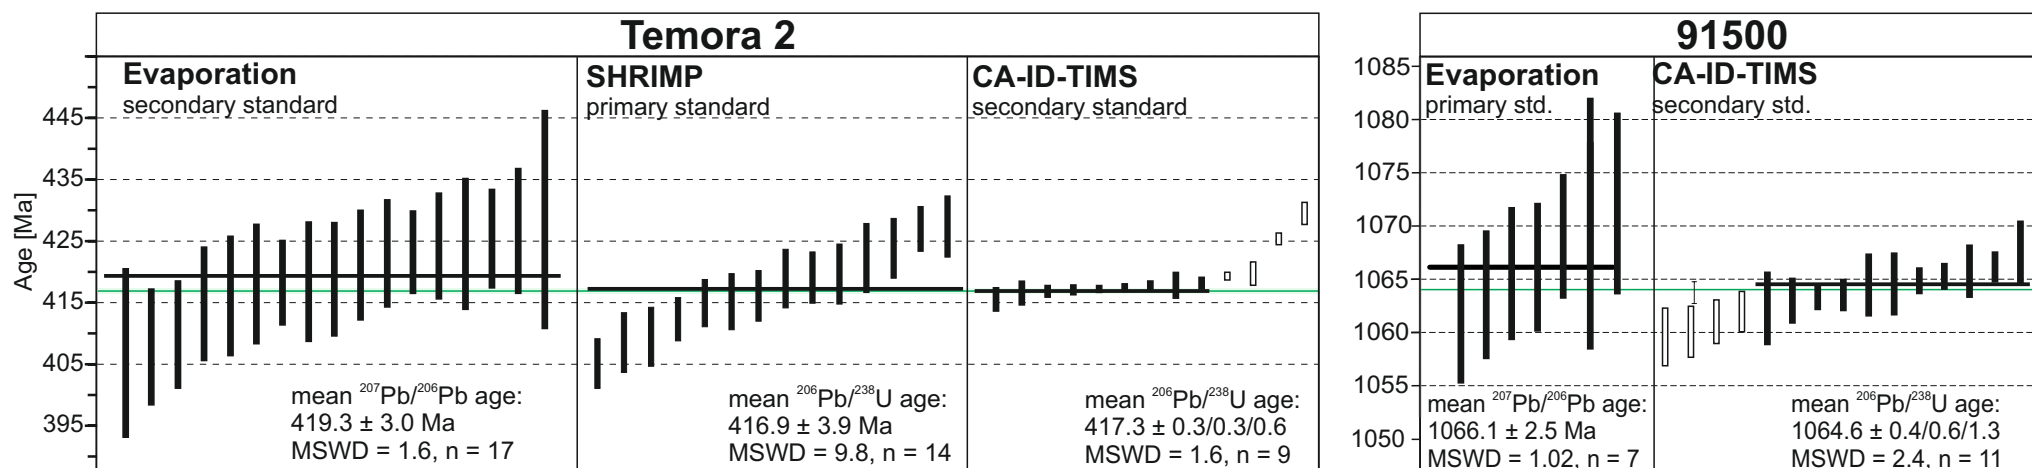

Supplement 4: Compilation of standard data of two different reference materials acquired with the three different zircon dating methods used during this study. Each vertical bar represents a single measurement including  $2\sigma$  error. Unfilled bars are considered to be outliers and were not used for the weighted mean age calculation. MSWD = mean squared weighted deviation. Horizontal black bars represent the calculated mean ages, dark green bars represent published reference ages with their standard deviation (light green) for each of the two standards according to Black et al. (2003) and von Quadt et al. (2016) for Temora 2, and Schoene et al. (2006) for 91500. The SHRIMP data were first presented by Tichomirowa et al. (2019a).
